# Supplementary material for: The ability of a zinc pyrrolidine complex to catalyze the synthesis of cyclic carbonates from carbon dioxide and epoxides: a mechanistic theoretical investigation
Source: Royal Society of Chemistry journal article supplement (doi:10.1039/c7dt01642e), 2017-01-01
Supplement: c7dt01642e1.pdf [file c7dt01642e1.pdf]

# Electronic Supplementary Information

## **On the ability of zinc pyrrolidine complex to catalyze the synthesis of cyclic carbonates from carbon dioxide and epoxides: A mechanistic theoretical investigation**

Tiziana Marino\*, Fortuna Ponte, Gloria Mazzone, Emilia Sicilia, Marirosa Toscano and Nino Russo

*Dipartimento di Chimica e Tecnologie Chimiche, Università della Calabria, Rende (CS), 87036, Italy*

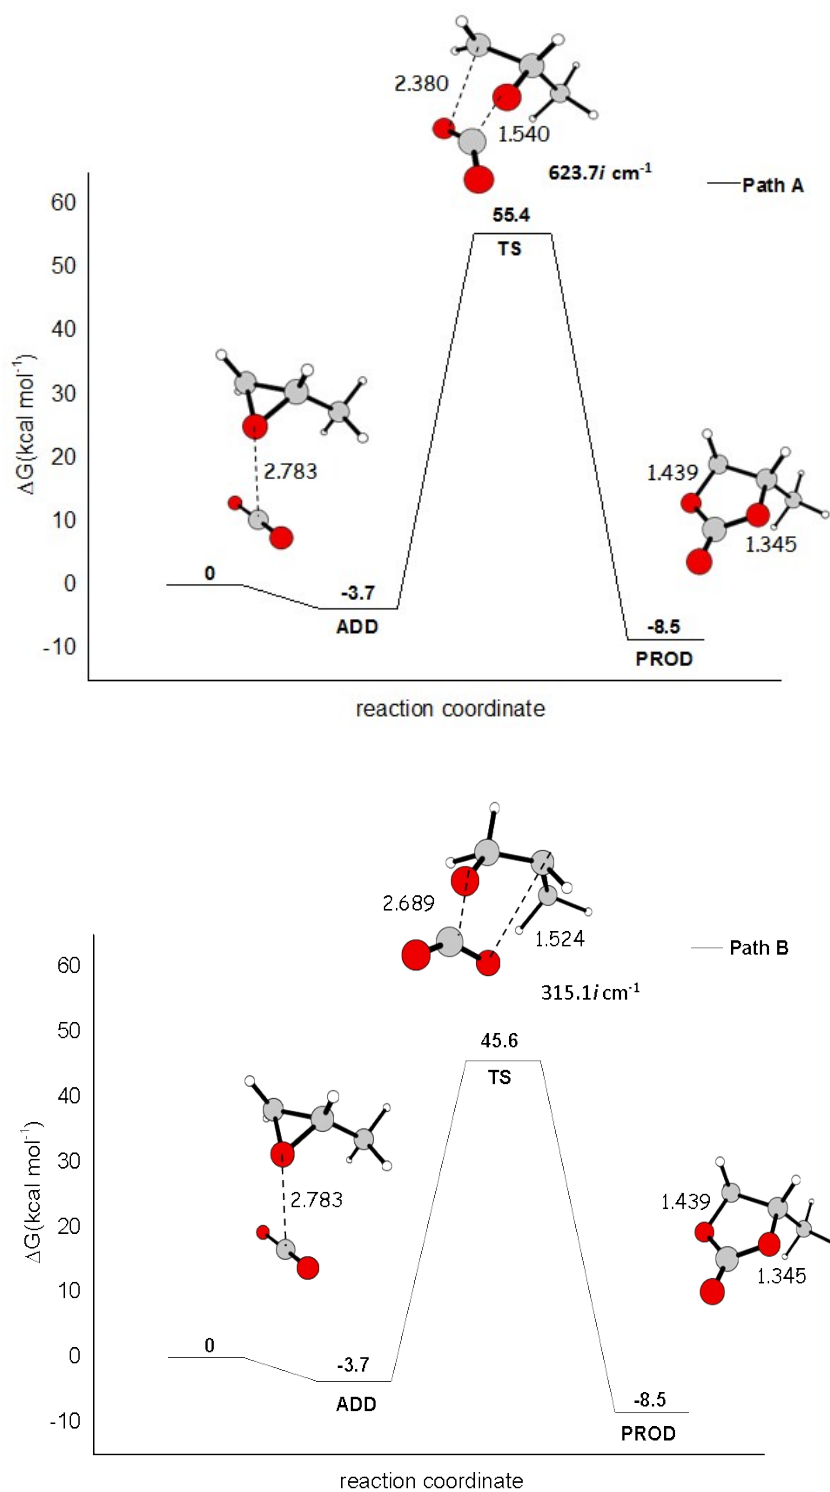

**Figure S1.** M06L zero-point-corrected free energy profiles for the uncatalyzed attack of CO<sub>2</sub> on the less substituted carbon (Path A) and more substituted carbon (Path B) of PO. Energies are relative to the reactants' asymptote. The most significant distances (Å) are reported. Red=oxygen.

## Reaction with Zn-1 and co-cat

### Zn-1

8      -1.081908    -0.066101    -0.410103

| Atomic Number | Coordinates (Angstroms) |           |           |
|---------------|-------------------------|-----------|-----------|
|               | X                       | Y         | Z         |
| 6             | -1.544354               | 0.861024  | 0.972872  |
| 6             | -0.376535               | 1.603134  | 0.299671  |
| 6             | -0.152367               | 0.805471  | -1.026105 |
| 6             | -1.491855               | 0.099068  | -1.210071 |
| 1             | -1.344910               | 0.584546  | 2.012556  |
| 1             | -2.434925               | 1.506055  | 0.935007  |
| 1             | 0.538499                | 1.550314  | 0.900561  |
| 1             | 0.148693                | 1.456056  | -1.853795 |
| 1             | -2.255294               | 0.811251  | -1.559955 |
| 1             | -1.448963               | -0.754970 | -1.894811 |
| 7             | -1.732413               | -0.356993 | 0.164294  |
| 6             | -3.003822               | -1.067945 | 0.399055  |
| 1             | -2.951451               | -1.996823 | -0.179374 |
| 1             | -3.012680               | -1.343607 | 1.460038  |
| 6             | -4.242966               | -0.292513 | 0.040529  |
| 6             | -4.751007               | -0.338136 | -1.263254 |
| 6             | -4.895557               | 0.508273  | 0.984838  |
| 6             | -5.876528               | 0.402215  | -1.618182 |
| 1             | -4.260141               | -0.969721 | -2.002548 |
| 6             | -6.021673               | 1.251197  | 0.634871  |
| 1             | -4.519804               | 0.540436  | 2.006348  |
| 6             | -6.513347               | 1.201209  | -0.668889 |
| 1             | -6.260238               | 0.351336  | -2.633645 |
| 1             | -6.518000               | 1.865599  | 1.381269  |
| 1             | -7.392802               | 1.777403  | -0.942401 |
| 7             | -0.764510               | 2.972212  | 0.006889  |
| 6             | 0.101657                | 3.907565  | -0.107781 |
| 1             | -0.313372               | 4.908531  | -0.272023 |
| 6             | 1.573386                | 3.891737  | -0.020080 |
| 6             | 2.224231                | 5.098102  | 0.272245  |
| 7             | 2.241575                | 2.740002  | -0.233352 |
| 6             | 3.608505                | 5.110051  | 0.390530  |
| 1             | 1.641321                | 6.004154  | 0.413817  |
| 6             | 3.571684                | 2.774525  | -0.125451 |
| 6             | 4.300987                | 3.920167  | 0.190899  |
| 1             | 4.136349                | 6.028697  | 0.628193  |
| 1             | 4.089362                | 1.832176  | -0.303876 |
| 1             | 5.382360                | 3.875834  | 0.266780  |
| 7             | 0.815839                | -0.228264 | -0.751642 |
| 6             | 2.001093                | -0.233976 | -1.224718 |
| 1             | 2.371270                | 0.549339  | -1.893679 |
| 6             | 2.887445                | -1.340430 | -0.854624 |
| 6             | 4.183355                | -1.448857 | -1.354732 |
| 7             | 2.359741                | -2.244951 | -0.004940 |
| 6             | 4.961202                | -2.534099 | -0.959235 |
| 1             | 4.565887                | -0.697708 | -2.039815 |
| 6             | 3.108967                | -3.279435 | 0.368607  |
| 6             | 4.417642                | -3.465404 | -0.081898 |
| 1             | 5.974188                | -2.649092 | -1.331539 |
| 1             | 2.642864                | -3.985046 | 1.052779  |
| 1             | 4.988650                | -4.325015 | 0.251109  |
| 30            | 0.140287                | -1.812979 | 0.473061  |
| 17            | -0.693945               | -3.513628 | -0.788165 |
| 17            | 0.291712                | -1.621789 | 2.723686  |

### Substrate

| Atomic Number | Coordinates (Angstroms) |           |           |
|---------------|-------------------------|-----------|-----------|
|               | X                       | Y         | Z         |
| 6             | -0.146434               | -0.027714 | 0.514099  |
| 6             | 1.033014                | 0.620710  | -0.052715 |
| 8             | 0.834973                | -0.788951 | -0.254138 |
| 1             | -0.192673               | -0.292798 | 1.586620  |
| 1             | 1.909553                | 0.862942  | 0.576342  |
| 1             | 0.965996                | 1.218006  | -0.980862 |
| 6             | -1.524928               | 0.097601  | -0.160921 |
| 1             | -2.078662               | -0.805701 | -0.011511 |
| 1             | -2.059317               | 0.918808  | 0.269134  |
| 1             | -1.394589               | 0.266766  | -1.209394 |

### INT

| Atomic Number | Coordinates (Angstroms) |           |           |
|---------------|-------------------------|-----------|-----------|
|               | X                       | Y         | Z         |
| 6             | -0.509650               | 1.251774  | 0.906313  |
| 6             | 0.845753                | 1.731330  | 0.354974  |
| 6             | 0.979917                | 0.967684  | -1.001142 |
| 6             | -0.475288               | 0.654133  | -1.335188 |
| 1             | -0.451418               | 0.843510  | 1.920407  |
| 1             | -1.208927               | 2.100378  | 0.900413  |
| 1             | 1.676491                | 1.439932  | 1.006364  |
| 1             | 1.518417                | 1.552469  | -1.754438 |
| 1             | -0.992614               | 1.564079  | -1.676032 |
| 1             | -0.595507               | -0.139428 | -2.080822 |
| 7             | -0.946366               | 0.191489  | -0.023250 |
| 6             | -2.375696               | -0.169322 | 0.060806  |
| 1             | -2.530003               | -1.002619 | -0.632825 |
| 1             | -2.541270               | -0.557251 | -1.072732 |
| 6             | -3.330982               | 0.953154  | -0.237324 |
| 6             | -3.717421               | 1.230327  | -1.554071 |
| 6             | -3.846914               | 1.747811  | 0.791360  |
| 6             | -4.589746               | 2.279803  | -1.836726 |
| 1             | -3.342835               | 0.602596  | -2.361632 |
| 6             | -4.722054               | 2.797195  | 0.515464  |
| 1             | -3.572039               | 1.525518  | 1.821510  |
| 6             | -5.092587               | 3.068319  | -0.801189 |
| 1             | -4.884099               | 2.477386  | -2.864107 |
| 1             | -5.120206               | 3.398449  | 1.328878  |
| 1             | -5.776996               | 3.883600  | -1.019268 |
| 7             | 0.810680                | 3.165285  | 0.124354  |
| 6             | 1.879901                | 3.865731  | 0.050889  |
| 1             | 1.720281                | 4.941533  | -0.084710 |
| 6             | 3.305159                | 3.502083  | 0.150302  |
| 6             | 4.225691                | 4.533281  | 0.385347  |
| 7             | 3.681647                | 2.215296  | 0.005193  |
| 6             | 5.574724                | 4.224045  | 0.507447  |
| 1             | 3.874835                | 5.557647  | 0.476077  |
| 6             | 4.981933                | 1.938694  | 0.124378  |
| 6             | 5.964369                | 2.895159  | 0.378887  |
| 1             | 6.306769                | 5.003593  | 0.694608  |
| 1             | 5.260380                | 0.891619  | 0.007008  |
| 1             | 7.005347                | 2.600723  | 0.462519  |
| 7             | 1.612941                | -0.296142 | -0.717667 |
| 6             | 2.793948                | -0.605354 | -1.087314 |
| 1             | 3.419315                | 0.065740  | -1.684556 |
| 6             | 3.321155                | -1.913184 | -0.689807 |
| 6             | 4.587289                | -2.346493 | -1.076888 |
| 7             | 2.500812                | -2.662000 | 0.075693  |

### CO<sub>2</sub>

| Atomic Number | Coordinates (Angstroms) |          |           |
|---------------|-------------------------|----------|-----------|
|               | X                       | Y        | Z         |
| 6             | -0.000071               | 0.000136 | -0.000050 |
| 8             | 1.081961                | 0.065999 | 0.410140  |

|    |           |           |           |
|----|-----------|-----------|-----------|
| 6  | 5.021024  | -3.600029 | -0.653118 |
| 1  | 5.213430  | -1.711874 | -1.697360 |
| 6  | 2.921384  | -3.860087 | 0.474964  |
| 6  | 4.176595  | -4.370585 | 0.137518  |
| 1  | 6.001861  | -3.967718 | -0.937532 |
| 1  | 2.226786  | -4.431211 | 1.086733  |
| 1  | 4.474958  | -5.351731 | 0.490369  |
| 30 | 0.399260  | -1.702415 | 0.306171  |
| 17 | -0.624321 | -2.997138 | -1.271159 |
| 17 | 0.120442  | -1.906073 | 2.541881  |
| 6  | -6.429796 | -0.457406 | 0.156895  |
| 6  | -6.591010 | -1.723048 | -0.550047 |
| 8  | -5.419117 | -1.471376 | 0.224446  |
| 1  | -6.123309 | 0.408609  | -0.435434 |
| 1  | -6.428919 | -1.774353 | -1.626825 |
| 1  | -7.258876 | -2.482271 | -0.141198 |
| 6  | -7.152586 | -0.151536 | 1.430216  |
| 1  | -6.519101 | 0.433892  | 2.104037  |
| 1  | -8.053181 | 0.436772  | 1.228821  |
| 1  | -7.447178 | -1.069902 | 1.945346  |

|    |           |           |           |
|----|-----------|-----------|-----------|
| 1  | -4.180230 | -2.912852 | -0.661168 |
| 1  | -5.341570 | -2.811398 | -2.880259 |
| 30 | -1.489760 | -1.525165 | 0.644018  |
| 17 | -3.100223 | -1.538332 | 2.226901  |
| 17 | -0.244155 | -3.338448 | 0.030164  |
| 6  | 1.103190  | -1.293162 | 3.146597  |
| 6  | -0.129038 | -0.774507 | 3.732709  |
| 8  | 0.050520  | -0.762100 | 2.311265  |
| 1  | 1.975416  | -0.636039 | 3.159823  |
| 1  | -0.152014 | 0.214288  | 4.187642  |
| 1  | -0.888876 | -1.473790 | 4.078023  |
| 6  | 1.384214  | -2.755848 | 3.046709  |
| 1  | 1.943732  | -2.989500 | 2.136550  |
| 1  | 1.978948  | -3.076619 | 3.907424  |
| 1  | 0.455563  | -3.331560 | 3.022372  |

### INT1

| Atomic Number | Coordinates (Angstroms) |           |           |
|---------------|-------------------------|-----------|-----------|
|               | X                       | Y         | Z         |
| 6             | 2.748499                | -0.031912 | -1.908105 |
| 6             | 1.485730                | 0.843544  | -1.809998 |
| 6             | 0.831136                | 0.419447  | -0.463763 |
| 6             | 1.955235                | -0.349828 | 0.233328  |
| 1             | 2.887149                | -0.500784 | -2.890227 |
| 1             | 3.626777                | 0.607647  | -1.708737 |
| 1             | 0.782020                | 0.643142  | -2.625340 |
| 1             | 0.530844                | 1.292624  | 0.112884  |
| 1             | 2.638070                | 0.378286  | 0.711152  |
| 1             | 1.591161                | -1.041164 | 1.002405  |
| 7             | 2.556071                | -1.056023 | -0.884543 |
| 6             | 3.711271                | -1.899328 | -0.578474 |
| 1             | 3.367147                | -2.676147 | 0.114815  |
| 1             | 4.002970                | -2.398672 | -1.510464 |
| 6             | 4.892542                | -1.170944 | 0.012864  |
| 6             | 4.990412                | -0.985032 | 1.396712  |
| 6             | 5.880091                | -0.613942 | -0.807513 |
| 6             | 6.043945                | -0.259073 | 1.948449  |
| 1             | 4.232368                | -1.421241 | 2.045912  |
| 6             | 6.936099                | 0.113730  | -0.261182 |
| 1             | 5.821523                | -0.760253 | -1.885139 |
| 6             | 7.019017                | 0.294400  | 1.118956  |
| 1             | 6.106943                | -0.129158 | 3.025528  |
| 1             | 7.696227                | 0.536843  | -0.912544 |
| 1             | 7.843113                | 0.858596  | 1.546985  |
| 7             | 1.858385                | 2.251514  | -1.823835 |
| 6             | 0.991296                | 3.193706  | -1.768929 |
| 1             | 1.410552                | 4.206855  | -1.758191 |
| 6             | -0.480111               | 3.180214  | -1.692022 |
| 6             | -1.140863               | 4.387107  | -1.426297 |
| 7             | -1.140036               | 2.017192  | -1.860087 |
| 6             | -2.525339               | 4.383025  | -1.291755 |
| 1             | -0.568213               | 5.304536  | -1.316453 |
| 6             | -2.465836               | 2.030954  | -1.731822 |
| 6             | -3.204779               | 3.178640  | -1.438148 |
| 1             | -3.062045               | 5.300994  | -1.070632 |
| 1             | -2.967947               | 1.071243  | -1.854904 |
| 1             | -4.282027               | 3.117790  | -1.322218 |
| 6             | -0.333108               | -0.449817 | -0.564365 |
| 6             | -0.429680               | -1.302079 | -1.516565 |
| 1             | 0.310451                | -1.373617 | -2.317767 |
| 6             | -1.569911               | -2.217780 | -1.566872 |
| 6             | -1.729628               | -3.147975 | -2.592176 |
| 7             | -2.458661               | -2.099773 | -0.562424 |
| 6             | -2.846616               | -3.978604 | -2.569628 |
| 1             | -0.991002               | -3.214438 | -3.385192 |
| 6             | -3.529012               | -2.891882 | -0.545679 |
| 6             | -3.763555               | -3.850010 | -1.531993 |
| 7             | -2.997930               | -4.715240 | -3.352073 |
| 6             | -4.214582               | -2.748751 | 0.286263  |
| 1             | -4.646561               | -4.476997 | -1.480039 |
| 30            | -1.826181               | -0.647425 | 0.965726  |
| 17            | -3.843427               | 0.403919  | 1.129134  |
| 17            | -0.978354               | -2.111602 | 2.500461  |

### TS1

| Atomic Number | Coordinates (Angstroms) |           |           |
|---------------|-------------------------|-----------|-----------|
|               | X                       | Y         | Z         |
| 6             | 2.117452                | 1.426057  | -1.808505 |
| 6             | 0.948214                | 2.016268  | -0.997996 |
| 6             | 0.488169                | 0.843031  | -0.085159 |
| 6             | 1.683362                | -0.110655 | -0.151977 |
| 1             | 2.051545                | 1.624809  | -2.885237 |
| 1             | 3.054955                | 1.875538  | -1.434143 |
| 1             | 0.124247                | 2.335285  | -1.642992 |
| 1             | 0.298557                | 1.184441  | 0.934202  |
| 1             | 2.471978                | 0.262662  | 0.529318  |
| 1             | 1.433526                | -1.141087 | 0.125781  |
| 7             | 2.041469                | -0.009772 | -1.554715 |
| 6             | 3.185400                | -0.812820 | -1.985348 |
| 1             | 2.905814                | -1.865542 | -1.856373 |
| 1             | 3.317938                | -0.637867 | -3.059793 |
| 6             | 4.469401                | -0.528902 | -1.247100 |
| 6             | 4.771414                | -1.211804 | -0.062607 |
| 6             | 5.349556                | 0.465507  | -1.688294 |
| 6             | 5.919486                | -0.906381 | 0.665504  |
| 1             | 4.097254                | -1.994382 | 0.286022  |
| 6             | 6.498696                | 0.776413  | -0.962877 |
| 1             | 5.132018                | 0.995952  | -2.614362 |
| 6             | 6.785120                | 0.091518  | 0.217204  |
| 1             | 6.142499                | -1.450354 | 1.579717  |
| 1             | 7.173248                | 1.549499  | -1.321317 |
| 1             | 7.681492                | 0.330338  | 0.782835  |
| 7             | 1.413479                | 3.144109  | -0.203770 |
| 6             | 0.607953                | 3.931638  | 0.406164  |
| 1             | 1.091131                | 4.742749  | 0.963662  |
| 6             | -0.861460               | 3.965038  | 0.512039  |
| 6             | -1.441660               | 5.012066  | 1.242704  |
| 7             | -1.597502               | 2.997597  | -0.069254 |
| 6             | -2.823569               | 5.055951  | 1.381771  |
| 1             | -0.808496               | 5.772053  | 1.692806  |
| 6             | -2.921137               | 3.050978  | 0.078905  |
| 6             | -3.583970               | 4.051622  | 0.790947  |
| 1             | -3.298236               | 5.854758  | 1.943547  |
| 1             | -3.484132               | 2.245929  | -0.393947 |
| 1             | -4.665274               | 4.035704  | 0.879936  |
| 7             | -0.692429               | 0.096430  | -0.497897 |
| 6             | -1.143810               | 0.156101  | -1.693249 |
| 1             | -0.715533               | 0.812908  | -2.454653 |
| 6             | -2.298660               | -0.649535 | -2.088777 |
| 6             | -2.877864               | -0.527568 | -3.350072 |
| 7             | -2.774925               | -1.497357 | -1.157234 |
| 6             | -3.989536               | -1.309974 | -3.650609 |
| 1             | -2.463450               | 0.169290  | -4.072136 |
| 6             | -3.837562               | -2.245267 | -1.448075 |
| 6             | -4.479112               | -2.183680 | -2.685691 |
| 1             | -4.465150               | -1.237727 | -4.623444 |

|   |           |          |          |
|---|-----------|----------|----------|
| 6 | -0.866167 | 1.655121 | 3.321306 |
| 6 | -1.172705 | 2.437918 | 2.126625 |
| 8 | -0.694615 | 1.087428 | 2.002686 |
| 1 | 0.098098  | 1.839615 | 3.796737 |
| 1 | -0.472016 | 3.189987 | 1.764947 |
| 1 | -2.215710 | 2.563459 | 1.834590 |
| 6 | -1.928076 | 1.064923 | 4.188687 |
| 1 | -1.608724 | 0.099452 | 4.589144 |
| 1 | -2.130967 | 1.734162 | 5.030157 |
| 1 | -2.851572 | 0.917470 | 3.622760 |

|    |           |           |           |
|----|-----------|-----------|-----------|
| 1  | -1.747255 | -3.213289 | -0.494210 |
| 6  | -1.631479 | -2.717870 | -3.256897 |
| 1  | -1.565120 | -1.953319 | -4.034931 |
| 1  | -1.511113 | -3.697386 | -3.729773 |
| 1  | -2.625958 | -2.666127 | -2.804278 |
| 53 | 3.295327  | -2.456745 | -0.647444 |

**INT2**

| Atomic Number | Coordinates (Angstroms) |           |           |
|---------------|-------------------------|-----------|-----------|
|               | X                       | Y         | Z         |
| 6             | 1.632321                | 2.258798  | 1.694920  |
| 6             | 0.821647                | 0.992004  | 2.032809  |
| 6             | 0.230942                | 0.538793  | 0.667824  |
| 6             | 1.129123                | 1.259051  | -0.337106 |
| 1             | 1.386705                | 3.121922  | 2.328716  |
| 1             | 2.701884                | 2.028339  | 1.837074  |
| 1             | 0.001332                | 1.195338  | 2.730774  |
| 1             | 0.302490                | -0.540435 | 0.551677  |
| 1             | 2.060761                | 0.671059  | -0.434408 |
| 1             | 0.676424                | 1.362790  | -1.330455 |
| 7             | 1.301231                | 2.553310  | 0.301657  |
| 6             | 2.170933                | 3.509605  | -0.380404 |
| 1             | 1.782540                | 3.622534  | -1.399752 |
| 1             | 2.052587                | 4.477966  | 0.122757  |
| 6             | 3.632474                | 3.134691  | -0.412312 |
| 6             | 4.121243                | 2.210312  | -1.343156 |
| 6             | 4.517858                | 3.656784  | 0.537151  |
| 6             | 5.456709                | 1.813679  | -1.321205 |
| 1             | 3.447005                | 1.795057  | -2.090141 |
| 6             | 5.856208                | 3.268580  | 0.559662  |
| 1             | 4.147369                | 4.376042  | 1.266819  |
| 6             | 6.328303                | 2.342806  | -0.370095 |
| 1             | 5.814664                | 1.085388  | -2.043936 |
| 1             | 6.529629                | 3.684949  | 1.304369  |
| 1             | 7.369266                | 2.032296  | -0.351810 |
| 7             | 1.704210                | -0.007473 | 2.618489  |
| 6             | 1.302382                | -1.186075 | 2.915112  |
| 1             | 2.079453                | -1.857987 | 3.297589  |
| 6             | -0.020467               | -1.830888 | 2.815861  |
| 6             | -0.086279               | -3.226533 | 2.916322  |
| 7             | -1.116954               | -1.065704 | 2.637632  |
| 6             | -1.320219               | -3.854852 | 2.785997  |
| 1             | 0.824263                | -3.799421 | 3.072927  |
| 6             | -2.292365               | -1.683544 | 2.522991  |
| 6             | -2.448903               | -3.069616 | 2.576992  |
| 1             | -1.397490               | -4.936981 | 2.838306  |
| 1             | -3.156649               | -1.038989 | 2.364426  |
| 1             | -3.431836               | -3.511805 | 2.449187  |
| 7             | -1.155938               | 0.919272  | 0.429187  |
| 6             | -1.611839               | 2.009459  | 0.927349  |
| 1             | -1.017547               | 2.648801  | 1.585262  |
| 6             | -2.978040               | 2.442511  | 0.638700  |
| 6             | -3.505896               | 3.615210  | 1.177150  |
| 7             | -3.693127               | 1.639897  | -0.170531 |
| 6             | -4.816640               | 3.961537  | 0.862741  |
| 1             | -2.895139               | 4.236415  | 1.825184  |
| 6             | -4.948248               | 1.971917  | -0.467588 |
| 6             | -5.552989               | 3.127171  | 0.027822  |
| 1             | -5.255767               | 4.869586  | 1.263936  |
| 1             | -5.480075               | 1.286538  | -1.123692 |
| 1             | -6.577280               | 3.360599  | -0.240754 |
| 30            | -2.491608               | -0.039740 | -0.975648 |
| 17            | -4.070697               | -1.651811 | -0.574844 |
| 17            | -2.160068               | 0.883353  | -3.042781 |
| 6             | -0.568765               | -2.523850 | -2.225975 |
| 6             | -0.770122               | -2.852940 | -0.817744 |
| 8             | -0.776798               | -1.477455 | -1.247895 |
| 1             | 0.465810                | -2.522509 | -2.574050 |
| 1             | 0.089038                | -3.109829 | -0.196607 |

**TS2**

| Atomic Number | Coordinates (Angstroms) |           |           |
|---------------|-------------------------|-----------|-----------|
|               | X                       | Y         | Z         |
| 6             | 2.246332                | -1.847711 | -1.968168 |
| 6             | 1.259195                | -0.672487 | -2.092237 |
| 6             | 0.618680                | -0.554773 | -0.673711 |
| 6             | 1.579414                | -1.376611 | 0.188192  |
| 1             | 2.173598                | -2.574302 | -2.788023 |
| 1             | 3.271341                | -1.435173 | -1.967737 |
| 1             | 0.476415                | -0.868959 | -2.831549 |
| 1             | 0.571589                | 0.486290  | -0.337596 |
| 1             | 2.455775                | -0.748670 | 0.437883  |
| 1             | 1.128520                | -1.724459 | 1.122538  |
| 7             | 1.895001                | -2.482065 | -0.702444 |
| 6             | 2.836649                | -3.476807 | -0.193440 |
| 1             | 2.373210                | -3.937833 | 0.687832  |
| 1             | 2.930426                | -4.256941 | -0.959323 |
| 6             | 4.201926                | -2.946112 | 0.169179  |
| 6             | 4.435309                | -2.400462 | 1.437084  |
| 6             | 5.243761                | -2.932133 | -0.764772 |
| 6             | 5.673937                | -1.853124 | 1.763937  |
| 1             | 3.633130                | -2.407162 | 2.173832  |
| 6             | 6.485991                | -2.387143 | -0.443124 |
| 1             | 5.077687                | -3.359541 | -1.752812 |
| 6             | 6.703046                | -1.844026 | 0.822587  |
| 1             | 5.836131                | -1.433336 | 2.753048  |
| 1             | 7.284722                | -2.386157 | -1.180402 |
| 1             | 7.670121                | -1.417448 | 1.074997  |
| 7             | 1.978133                | 0.539687  | -2.456127 |
| 6             | 1.364256                | 1.632087  | -2.720327 |
| 1             | 2.013588                | 2.487675  | -2.939152 |
| 6             | -0.068953               | 1.973889  | -2.786665 |
| 6             | -0.411007               | 3.325301  | -2.929397 |
| 7             | -0.997021               | 0.999056  | -2.717642 |
| 6             | -1.752307               | 3.682963  | -2.978328 |
| 1             | 0.373725                | 4.075607  | -2.976413 |
| 6             | -2.279357               | 1.358903  | -2.772186 |
| 6             | -2.711604               | 2.678911  | -2.898038 |
| 1             | -2.043773               | 4.725368  | -3.068998 |
| 1             | -3.003896               | 0.547839  | -2.696367 |
| 1             | -3.772620               | 2.907407  | -2.913789 |
| 7             | -0.714471               | -1.110151 | -0.512032 |
| 6             | -1.166475               | -2.010398 | -1.296799 |
| 1             | -0.608642               | -2.387152 | -2.159673 |
| 6             | -2.508579               | -2.551576 | -1.076243 |
| 6             | -3.080224               | -3.486066 | -1.939407 |
| 7             | -3.157703               | -2.075250 | -0.000018 |
| 6             | -4.373448               | -3.929399 | -1.677323 |
| 1             | -2.517958               | -3.848382 | -2.795211 |
| 6             | -4.392706               | -2.503616 | 0.250062  |
| 6             | -5.044603               | -3.428636 | -0.566091 |
| 1             | -4.848818               | -4.654607 | -2.330552 |
| 1             | -4.861540               | -2.092249 | 1.141654  |
| 1             | -6.053590               | -3.746664 | -0.326581 |
| 30            | -1.979421               | -0.546216 | 1.189865  |
| 17            | -3.378498               | 1.234301  | 0.629951  |
| 17            | -2.758469               | -1.658460 | 3.153274  |
| 6             | -0.240118               | 1.305906  | 2.788799  |
| 6             | -0.550585               | 2.612741  | 2.310298  |
| 8             | -0.320804               | 0.232418  | 2.041647  |
| 1             | 0.531407                | 1.282452  | 3.574502  |
| 1             | -0.338431               | 3.485794  | 2.914095  |
| 1             | -1.225165               | 2.708570  | 1.463417  |
| 6             | -1.643771               | 1.667121  | 3.726574  |
| 1             | -1.869489               | 0.620196  | 3.954501  |
| 1             | -1.398669               | 2.235078  | 4.621748  |

|    |           |          |          |
|----|-----------|----------|----------|
| 1  | -2.518533 | 2.070919 | 3.212570 |
| 53 | 1.621907  | 3.510647 | 0.588353 |

### INT3

| Atomic<br>Number | Coordinates (Angstroms) |           |           |
|------------------|-------------------------|-----------|-----------|
|                  | X                       | Y         | Z         |
| 6                | 2.967589                | 0.959272  | 1.772783  |
| 6                | 1.692447                | 0.113854  | 1.938078  |
| 6                | 0.966472                | 0.232546  | 0.565063  |
| 6                | 2.073126                | 0.751078  | -0.353171 |
| 1                | 3.135217                | 1.668778  | 2.594435  |
| 1                | 3.832929                | 0.273360  | 1.737465  |
| 1                | 1.036382                | 0.506318  | 2.723087  |
| 1                | 0.583301                | -0.730821 | 0.223181  |
| 1                | 2.695275                | -0.107409 | -0.671357 |
| 1                | 1.685531                | 1.248389  | -1.249409 |
| 7                | 2.768870                | 1.683226  | 0.520022  |
| 6                | 3.944374                | 2.348044  | -0.036566 |
| 1                | 3.618177                | 2.867120  | -0.945752 |
| 1                | 4.259274                | 3.115598  | 0.682215  |
| 6                | 5.109621                | 1.440001  | -0.345586 |
| 6                | 5.161145                | 0.715666  | -1.542618 |
| 6                | 6.134321                | 1.256390  | 0.589369  |
| 6                | 6.206134                | -0.170858 | -1.796380 |
| 1                | 4.375744                | 0.854314  | -2.283777 |
| 6                | 7.183748                | 0.373963  | 0.339792  |
| 1                | 6.106300                | 1.818255  | 1.522394  |
| 6                | 7.220390                | -0.344284 | -0.854694 |
| 1                | 6.230051                | -0.725345 | -2.730811 |
| 1                | 7.972156                | 0.246241  | 1.076986  |
| 1                | 8.036333                | -1.034356 | -1.052016 |
| 7                | 2.048575                | -1.264560 | 2.238266  |
| 6                | 1.174378                | -2.129024 | 2.599081  |
| 1                | 1.570718                | -3.133002 | 2.796232  |
| 6                | -0.283547               | -2.046002 | 2.791796  |
| 6                | -0.954129               | -3.196170 | 3.232672  |
| 7                | -0.929626               | -0.899178 | 2.507849  |
| 6                | -2.337590               | -3.166321 | 3.356139  |
| 1                | -0.389739               | -4.098397 | 3.455325  |
| 6                | -2.257423               | -0.890573 | 2.619450  |
| 6                | -3.009527               | -1.992142 | 3.030082  |
| 1                | -2.883423               | -4.046292 | 3.683836  |
| 1                | -2.751775               | 0.044457  | 2.354546  |
| 1                | -4.091416               | -1.925676 | 3.084139  |
| 7                | -0.150090               | 1.157611  | 0.521657  |
| 6                | -0.211674               | 2.166192  | 1.302264  |
| 1                | 0.548948                | 2.384421  | 2.060102  |
| 6                | -1.361398               | 3.069646  | 1.228912  |
| 6                | -1.458021               | 4.205261  | 2.033710  |
| 7                | -2.319694               | 2.719442  | 0.355777  |
| 6                | -2.592101               | 5.004547  | 1.922400  |
| 1                | -0.657418               | 4.449152  | 2.726648  |
| 6                | -3.401762               | 3.485627  | 0.253267  |
| 6                | -3.584992               | 4.638978  | 1.018121  |
| 1                | -2.698973               | 5.896795  | 2.531936  |
| 1                | -4.143568               | 3.155247  | -0.471678 |
| 1                | -4.486294               | 5.231660  | 0.901388  |
| 30               | -1.645587               | 1.001975  | -1.110002 |
| 17               | -3.877079               | 0.183084  | -0.933223 |
| 17               | -1.343668               | 2.834530  | -2.625147 |
| 6                | -0.937225               | -1.280752 | -2.851335 |
| 6                | -1.759588               | -2.425680 | -2.276720 |
| 8                | -0.514510               | -0.386326 | -1.897610 |
| 1                | -0.050797               | -1.732709 | -3.347883 |
| 1                | -2.027038               | -3.191455 | -3.009267 |
| 1                | -2.644917               | -2.057397 | -1.752768 |
| 6                | -1.791636               | -0.639778 | -3.954749 |
| 1                | -1.235464               | 0.188007  | -4.404299 |
| 1                | -2.061283               | -1.352896 | -4.743315 |
| 1                | -2.712914               | -0.226684 | -3.525858 |
| 53               | -0.639622               | -3.518989 | -0.707254 |

### TS3

| Atomic<br>Number | Coordinates (Angstroms) |           |           |
|------------------|-------------------------|-----------|-----------|
|                  | X                       | Y         | Z         |
| 6                | 3.877996                | -0.386041 | 1.178788  |
| 6                | 2.337084                | -0.338378 | 1.105184  |
| 6                | 2.042915                | 0.213074  | -0.352946 |
| 6                | 3.446897                | 0.360218  | -0.974696 |
| 1                | 4.260304                | -0.117852 | 2.170629  |
| 1                | 4.200449                | -1.416426 | 0.950833  |
| 1                | 1.942593                | 0.394108  | 1.818677  |
| 1                | 1.455032                | -0.526753 | -0.901705 |
| 1                | 3.693413                | -0.572869 | -1.514404 |
| 1                | 3.518743                | 1.186996  | -1.692772 |
| 7                | 4.319905                | 0.586226  | 0.177012  |
| 6                | 5.756906                | 0.688157  | -0.075563 |
| 1                | 5.910744                | 1.546677  | -0.743190 |
| 1                | 6.235127                | 0.935116  | 0.880586  |
| 6                | 6.445267                | -0.532193 | -0.678629 |
| 6                | 6.564030                | -0.675493 | -2.069507 |
| 6                | 6.957824                | -1.551351 | 0.139002  |
| 6                | 7.167990                | -1.804537 | -2.630147 |
| 1                | 6.182211                | 0.108604  | -2.719862 |
| 6                | 7.562063                | -2.683360 | -0.414684 |
| 1                | 6.883234                | -1.457012 | 1.219700  |
| 6                | 7.668017                | -2.814216 | -1.802652 |
| 1                | 7.247570                | -1.895580 | -3.710376 |
| 1                | 7.947845                | -3.462778 | 0.237088  |
| 1                | 8.135667                | -3.694687 | -2.234979 |
| 7                | 1.769355                | -1.638782 | 1.437255  |
| 6                | 0.520258                | -1.796121 | 1.218107  |
| 1                | -0.111566               | -1.020743 | 0.765121  |
| 6                | -0.217363               | -3.038528 | 1.547811  |
| 6                | -1.597812               | -3.042588 | 1.281159  |
| 7                | 0.426409                | -4.099838 | 2.074617  |
| 6                | -2.338796               | -4.186775 | 1.573384  |
| 1                | -2.055273               | -2.154156 | 0.852537  |
| 6                | -0.299463               | -5.184748 | 2.350672  |
| 6                | -1.678615               | -5.285814 | 2.123607  |
| 1                | -3.405339               | -4.212815 | 1.368530  |
| 1                | 0.246059                | -6.027032 | 2.776832  |
| 1                | -2.208495               | -6.201742 | 2.371155  |
| 7                | 1.214791                | 1.409422  | -0.278779 |
| 6                | 1.731013                | 2.567225  | -0.200415 |
| 1                | 2.815153                | 2.746760  | 0.852545  |
| 6                | 0.895465                | 3.783863  | -0.105209 |
| 6                | 1.529618                | 5.031251  | -0.200223 |
| 7                | -0.441754               | 3.675019  | 0.057067  |
| 6                | 0.768078                | 6.197328  | -0.147173 |
| 1                | 2.609052                | 5.071153  | -0.314954 |
| 6                | -1.167675               | 4.799917  | 0.109244  |
| 6                | -0.611060               | 6.079371  | 0.004493  |
| 1                | 1.243126                | 7.172146  | -0.220447 |
| 1                | -2.234447               | 4.651429  | 0.257444  |
| 1                | -1.255675               | 6.951172  | 0.055449  |
| 30               | -1.613388               | 1.723148  | 0.775299  |
| 17               | -0.563165               | 1.573825  | 2.785512  |
| 17               | -3.702924               | 2.789521  | 0.780399  |
| 6                | -2.399051               | -0.023950 | -1.477024 |
| 6                | -3.943125               | -0.069257 | -1.322715 |
| 8                | -1.759696               | 0.096880  | -0.250386 |
| 1                | -2.071190               | -0.964021 | -1.954483 |
| 1                | -4.489344               | 0.485974  | -2.084909 |
| 1                | -4.253509               | 0.241524  | -0.328882 |
| 6                | -2.043761               | 1.118723  | -2.457216 |
| 1                | -0.954763               | 1.189054  | -2.542219 |
| 1                | -2.466592               | 0.938082  | -3.454920 |
| 1                | -2.424498               | 2.077403  | -2.086282 |
| 53               | -4.838907               | -2.126360 | -1.537871 |

INT4

| Atomic Number | Coordinates (Angstroms) |           |           |
|---------------|-------------------------|-----------|-----------|
|               | X                       | Y         | Z         |
| 6             | 3.261921                | -0.728589 | 1.764330  |
| 6             | 1.842265                | -0.184493 | 1.868706  |
| 6             | 1.578072                | 0.394333  | 0.447268  |
| 6             | 2.969180                | 0.405592  | -0.210582 |
| 1             | 3.772812                | -0.802729 | 2.730471  |
| 1             | 3.236748                | -1.739603 | 1.311892  |
| 1             | 1.855035                | 0.646481  | 2.589317  |
| 1             | 0.912230                | -0.269364 | -0.109725 |
| 1             | 3.039008                | -0.443365 | -0.914292 |
| 1             | 3.168540                | 1.322849  | -0.776223 |
| 7             | 3.893297                | 0.267334  | 0.912293  |
| 6             | 5.291657                | 0.023883  | 0.551815  |
| 1             | 5.641592                | 0.910091  | 0.007957  |
| 1             | 5.858323                | -0.027503 | 1.489304  |
| 6             | 5.545485                | -1.211402 | -0.276256 |
| 6             | 5.544141                | -1.140734 | -1.673931 |
| 6             | 5.735278                | -2.459374 | 0.328563  |
| 6             | 5.725558                | -2.284075 | -2.449427 |
| 1             | 5.402158                | -0.174664 | -2.156392 |
| 6             | 5.916363                | -3.606690 | -0.441821 |
| 1             | 5.745793                | -2.528508 | 1.415351  |
| 6             | 5.910950                | -3.521370 | -1.833734 |
| 1             | 5.722084                | -2.209580 | -3.533514 |
| 1             | 6.063886                | -4.567453 | 0.044164  |
| 1             | 6.052787                | -4.414903 | -2.435550 |
| 7             | 0.899526                | -1.168318 | 2.357148  |
| 6             | -0.339044               | -0.969599 | 2.112546  |
| 1             | -0.701109               | -0.094618 | 1.541042  |
| 6             | -1.408897               | -1.872510 | 2.564943  |
| 6             | -2.735496               | -1.479709 | 2.346671  |
| 7             | -1.079779               | -3.038871 | 3.156176  |
| 6             | -3.764598               | -2.321784 | 2.753779  |
| 1             | -2.938325               | -0.525125 | 1.862135  |
| 6             | -2.081216               | -3.832006 | 3.535575  |
| 6             | -3.433824               | -3.527055 | 3.361094  |
| 1             | -4.802072               | -2.043339 | 2.591898  |
| 1             | -1.791947               | -4.771207 | 4.006462  |
| 1             | -4.197920               | -4.223560 | 3.692146  |
| 7             | 0.929551                | 1.697772  | 0.418384  |
| 6             | 1.414768                | 2.671826  | 1.089944  |
| 1             | 2.307462                | 2.576012  | 1.722920  |
| 6             | 0.761550                | 3.979135  | 1.028479  |
| 6             | 1.190527                | 5.054663  | 1.806072  |
| 7             | -0.285109               | 4.068207  | 0.188051  |
| 6             | 0.495939                | 6.257878  | 1.720408  |
| 1             | 2.046298                | 4.939494  | 2.465185  |
| 6             | -0.948410               | 5.219905  | 0.111647  |
| 6             | -0.596023               | 6.342034  | 0.863567  |
| 1             | 0.801282                | 7.113262  | 2.314979  |
| 1             | -1.779002               | 5.232215  | -0.590738 |
| 1             | -1.168442               | 7.258649  | 0.768955  |
| 30            | -0.916359               | 2.129045  | -0.871116 |
| 17            | -2.682120               | 1.830079  | 0.668566  |
| 17            | -1.614239               | 3.543406  | -2.680821 |
| 6             | -1.353425               | -0.463110 | -2.266769 |
| 6             | -1.597474               | -1.330104 | -1.041625 |
| 8             | -0.435721               | 0.477563  | -1.819453 |
| 1             | -0.887033               | -1.092502 | -3.052228 |
| 1             | -2.130224               | -0.771777 | -0.267090 |
| 1             | -0.669989               | -1.750906 | -0.650403 |
| 6             | -2.634898               | 0.132268  | -2.828222 |
| 1             | -2.399275               | 0.827354  | -3.637778 |
| 1             | -3.311200               | -0.641293 | -3.209132 |
| 1             | -3.159919               | 0.698746  | -2.048283 |
| 53            | -2.866404               | -3.161333 | -1.375433 |

INT5

| Atomic Number | Coordinates (Angstroms) |           |           |
|---------------|-------------------------|-----------|-----------|
|               | X                       | Y         | Z         |
| 6             | -2.555435               | -2.089447 | -1.947934 |
| 6             | -1.426404               | -1.069888 | -2.038296 |
| 6             | -1.486528               | -0.342906 | -0.659378 |
| 6             | -2.825723               | -0.806905 | -0.061055 |
| 1             | -2.939327               | -2.400807 | -2.925538 |
| 1             | -2.194796               | -2.993363 | -1.418734 |
| 1             | -1.693476               | -0.343935 | -2.820407 |
| 1             | -0.658177               | -0.666631 | -0.024547 |
| 1             | -2.625590               | -1.574502 | 0.709372  |
| 1             | -3.382815               | 0.005595  | 0.417056  |
| 7             | -3.560187               | -1.348486 | -1.201716 |
| 6             | -4.791434               | -2.069356 | -0.871891 |
| 1             | -5.462213               | -1.574511 | -0.383620 |
| 1             | -5.257744               | -2.357653 | -1.821783 |
| 6             | -4.617974               | -3.283706 | 0.005716  |
| 6             | -4.684216               | -3.174127 | 1.399451  |
| 6             | -4.332717               | -4.535172 | -0.552342 |
| 6             | -4.467272               | -4.282736 | 2.215723  |
| 1             | -4.913108               | -2.207266 | 1.845918  |
| 6             | -4.115492               | -5.647446 | 0.258543  |
| 1             | -4.284501               | -4.635311 | -1.635735 |
| 6             | -4.181180               | -5.522870 | 1.646061  |
| 1             | -4.522485               | -4.179119 | 3.296017  |
| 1             | -3.897790               | -6.612138 | -0.192140 |
| 1             | -4.011854               | -6.388769 | 2.280201  |
| 7             | -0.162800               | -1.669481 | -2.409212 |
| 6             | 0.899348                | -1.002617 | -2.164243 |
| 1             | 0.879902                | -0.011724 | -1.673557 |
| 6             | 2.247481                | -1.472935 | -2.519125 |
| 6             | 3.317190                | -0.582413 | -2.364240 |
| 7             | 2.404621                | -2.732027 | -2.975008 |
| 6             | 4.599851                | -1.003355 | -2.698747 |
| 1             | 3.127578                | 0.421627  | -1.986019 |
| 6             | 3.642877                | -3.117467 | -3.281177 |
| 6             | 4.770920                | -2.300834 | -3.166470 |
| 1             | 5.446951                | -0.332411 | -2.588149 |
| 1             | 3.747269                | -4.141213 | -3.639611 |
| 1             | 5.751408                | -2.682470 | -3.434289 |
| 7             | -1.364477               | 1.106816  | -0.739192 |
| 6             | -2.205728               | 1.769176  | -1.438176 |
| 1             | -3.014149               | 1.288062  | -2.006077 |
| 6             | -2.101745               | 3.225934  | -1.492632 |
| 6             | -2.922688               | 3.991551  | -2.320920 |
| 7             | -1.156975               | 3.772762  | -0.706524 |
| 6             | -2.739879               | 5.370875  | -2.349161 |
| 1             | -3.679557               | 3.506417  | -2.930616 |
| 6             | -0.982771               | 5.092474  | -0.740087 |
| 6             | -1.748647               | 5.931831  | -1.550918 |
| 1             | -3.359159               | 5.995590  | -2.985246 |
| 1             | -0.210760               | 5.477216  | -0.077350 |
| 1             | -1.568713               | 7.001536  | -1.544624 |
| 30            | 0.150966                | 2.306282  | 0.477398  |
| 17            | 1.967045                | 2.577186  | -0.988732 |
| 17            | 0.208691                | 3.998881  | 2.182302  |
| 6             | 1.479604                | 0.184740  | 2.124889  |
| 6             | 2.065264                | -0.631126 | 0.983192  |
| 8             | 0.297467                | 0.683270  | 1.590824  |
| 1             | 1.242746                | -0.501427 | 2.963622  |
| 1             | 2.396196                | 0.018584  | 0.168190  |
| 1             | 1.363433                | -1.382727 | 0.618481  |
| 6             | 2.437722                | 1.250230  | 2.632168  |
| 1             | 1.963174                | 1.844777  | 3.416682  |
| 1             | 3.356579                | 0.808474  | 3.034281  |
| 1             | 2.707597                | 1.930608  | 1.814213  |
| 53            | 3.885775                | -1.853691 | 1.484452  |
| 6             | -1.636993               | 1.408651  | 3.130519  |

|   |           |          |          |
|---|-----------|----------|----------|
| 8 | -2.305071 | 1.647589 | 2.197206 |
| 8 | -1.081779 | 1.179219 | 4.134492 |

|   |          |           |          |
|---|----------|-----------|----------|
| 8 | 1.981279 | -1.460538 | 3.559546 |
|---|----------|-----------|----------|

### TS4

| Atomic Number | Coordinates (Angstroms) |           |           |
|---------------|-------------------------|-----------|-----------|
|               | X                       | Y         | Z         |
| 6             | -0.328322               | 3.394555  | -1.061739 |
| 6             | -0.377546               | 1.870219  | -1.156157 |
| 6             | 0.331064                | 1.413084  | 0.144558  |
| 6             | -0.102849               | 2.481994  | 1.132673  |
| 1             | 0.496384                | 3.801277  | -1.668933 |
| 1             | -1.266522               | 3.808962  | -1.452108 |
| 1             | 0.163861                | 1.473580  | -2.026526 |
| 1             | -0.014649               | 0.418751  | 0.433497  |
| 1             | -1.100530               | 2.204855  | 1.511593  |
| 1             | 0.579963                | 2.566913  | 1.990034  |
| 7             | -0.112131               | 3.721389  | 0.354571  |
| 6             | -0.903025               | 4.819473  | 0.904295  |
| 1             | -0.527448               | 5.013478  | 1.918068  |
| 1             | -0.687046               | 5.715889  | 0.307629  |
| 6             | -2.391348               | 4.578142  | 0.944310  |
| 6             | -2.981513               | 3.908411  | 2.022559  |
| 6             | -3.207007               | 4.950057  | -0.130219 |
| 6             | -4.337344               | 3.591662  | 2.013656  |
| 1             | -2.367408               | 3.632588  | 2.878317  |
| 6             | -4.563176               | 4.636600  | -0.144635 |
| 1             | -2.768314               | 5.493024  | -0.966441 |
| 6             | -5.130371               | 3.948490  | 0.925332  |
| 1             | -4.773716               | 3.057515  | 2.853815  |
| 1             | -5.176267               | 4.922479  | -0.995528 |
| 1             | -6.185402               | 3.687964  | 0.910041  |
| 7             | -1.753776               | 1.402167  | -1.093000 |
| 6             | -1.978864               | 0.326507  | -1.746714 |
| 1             | -1.180133               | -0.172234 | -2.322500 |
| 6             | -3.269135               | -0.374905 | -1.745351 |
| 6             | -3.324421               | -1.631536 | -2.363761 |
| 7             | -4.334109               | 0.186576  | -1.142590 |
| 6             | -4.519426               | -2.340121 | -2.352098 |
| 1             | -2.424814               | -2.044801 | -2.815970 |
| 6             | -5.468972               | -0.505664 | -1.146731 |
| 6             | -5.622516               | -1.765913 | -1.731198 |
| 1             | -4.581298               | -3.326827 | -2.803358 |
| 1             | -6.314746               | -0.028698 | -0.648833 |
| 1             | -6.578593               | -2.280269 | -1.685578 |
| 7             | 1.748807                | 1.272854  | -0.096383 |
| 6             | 2.555684                | 2.255192  | -0.022033 |
| 1             | 2.244387                | 3.275540  | 0.247971  |
| 6             | 3.971162                | 2.011869  | -0.309771 |
| 6             | 4.912564                | 3.040150  | -0.252468 |
| 7             | 4.302463                | 0.750685  | -0.638410 |
| 6             | 6.239076                | 2.751268  | -0.555536 |
| 1             | 4.597106                | 4.042114  | 0.028106  |
| 6             | 5.573686                | 0.475590  | -0.923362 |
| 6             | 6.576159                | 1.448155  | -0.902101 |
| 1             | 6.995960                | 3.530834  | -0.518120 |
| 1             | 5.773380                | -0.570581 | -1.150568 |
| 1             | 7.598507                | 1.175644  | -1.144929 |
| 30            | 2.646979                | -0.860699 | -0.455840 |
| 17            | 1.329259                | -1.068592 | -2.358630 |
| 17            | 4.305916                | -2.463035 | -0.416514 |
| 6             | 0.620643                | -2.499320 | 1.233231  |
| 6             | -0.720441               | -2.076987 | 0.653121  |
| 8             | 1.427591                | -1.348630 | 1.126015  |
| 1             | 0.495988                | -2.713935 | 2.307132  |
| 1             | -0.659777               | -1.900768 | -0.426517 |
| 1             | -1.132200               | -1.204953 | 1.164202  |
| 6             | 1.230386                | -3.699162 | 0.535157  |
| 1             | 2.225114                | -3.897679 | 0.940192  |
| 1             | 0.607172                | -4.591246 | 0.659226  |
| 1             | 1.351145                | -3.499716 | -0.536594 |
| 53            | -2.323753               | -3.608617 | 0.903688  |
| 6             | 2.398073                | -0.851327 | 2.617780  |
| 8             | 3.154801                | -0.034451 | 2.162415  |

### INT6

| Atomic Number | Coordinates (Angstroms) |           |           |
|---------------|-------------------------|-----------|-----------|
|               | X                       | Y         | Z         |
| 6             | -0.264232               | 3.259722  | 1.133385  |
| 6             | -0.164700               | 1.744576  | 1.321756  |
| 6             | -0.754087               | 1.181642  | 0.001587  |
| 6             | -0.297231               | 2.216787  | -1.010858 |
| 1             | -1.114460               | 3.678729  | 1.693321  |
| 1             | 0.649055                | 3.729418  | 1.521527  |
| 1             | -0.749379               | 1.373864  | 2.176277  |
| 1             | -0.326787               | 0.193832  | -0.197139 |
| 1             | 0.748560                | 1.987180  | -1.278659 |
| 1             | -0.894321               | 2.205492  | -1.932332 |
| 7             | -0.453427               | 3.485057  | -0.305429 |
| 6             | 0.230892                | 4.639498  | -0.889561 |
| 1             | -0.152935               | 4.760725  | -1.910494 |
| 1             | -0.077150               | 5.526764  | -0.323208 |
| 6             | 1.735077                | 4.534393  | -0.912154 |
| 6             | 2.387643                | 3.876917  | -1.962501 |
| 6             | 2.507248                | 5.025127  | 0.147637  |
| 6             | 3.768023                | 3.688995  | -1.941378 |
| 1             | 1.804696                | 3.511836  | -2.806604 |
| 6             | 3.888217                | 4.841212  | 0.173078  |
| 1             | 2.018024                | 5.561137  | 0.959455  |
| 6             | 4.521397                | 4.166003  | -0.869495 |
| 1             | 4.256531                | 3.171321  | -2.762480 |
| 1             | 4.470473                | 5.224652  | 1.006993  |
| 1             | 5.597722                | 4.017569  | -0.849668 |
| 7             | 1.230003                | 1.341882  | 1.392339  |
| 6             | 1.486188                | 0.353764  | 2.160748  |
| 1             | 0.689449                | -0.152754 | 2.731513  |
| 6             | 2.826885                | -0.235668 | 2.290977  |
| 6             | 2.931214                | -1.520145 | 2.840040  |
| 7             | 3.894635                | 0.465664  | 1.863230  |
| 6             | 4.184642                | -2.115266 | 2.933631  |
| 1             | 2.033518                | -2.038990 | 3.169762  |
| 6             | 5.087633                | -0.118366 | 1.971519  |
| 6             | 5.290864                | -1.398833 | 2.491963  |
| 1             | 4.293354                | -3.115673 | 3.421282  |
| 1             | 5.937034                | 0.468967  | 1.624064  |
| 1             | 6.292163                | -1.814796 | 2.546298  |
| 7             | -2.182820               | 0.987319  | 0.112591  |
| 6             | -3.034717               | 1.936585  | 0.083971  |
| 1             | -2.764287               | 2.994259  | -0.032307 |
| 6             | -4.455259               | 1.584268  | 0.178171  |
| 6             | -5.446793               | 2.563164  | 0.186850  |
| 7             | -4.747088               | 0.267351  | 0.244827  |
| 6             | -6.779598               | 2.171325  | 0.267256  |
| 1             | -5.166516               | 3.610765  | 0.129572  |
| 6             | -6.026483               | -0.103606 | 0.319322  |
| 6             | -7.076374               | 0.814706  | 0.333916  |
| 1             | -7.572016               | 2.913523  | 0.275395  |
| 1             | -6.194213               | -1.177983 | 0.361896  |
| 1             | -8.100462               | 0.462896  | 0.393476  |
| 30            | -3.033532               | -1.121535 | 0.162145  |
| 17            | -1.783648               | -1.431836 | 2.122786  |
| 17            | -4.356883               | -3.070204 | 0.075999  |
| 6             | 0.455192                | -2.855618 | -1.192396 |
| 6             | 1.442506                | -1.743616 | -0.899543 |
| 8             | -0.850605               | -2.268430 | -1.049708 |
| 1             | 0.572220                | -3.192751 | -2.229223 |
| 1             | 1.387876                | -1.423179 | 0.143946  |
| 1             | 1.302145                | -0.895381 | -1.570315 |
| 6             | 0.517247                | -4.008570 | -0.219891 |
| 1             | -0.285243               | -4.720278 | -0.424048 |
| 1             | 1.473114                | -4.532978 | -0.301006 |
| 1             | 0.403241                | -3.649087 | 0.807841  |
| 53            | 3.532308                | -2.350700 | -1.211967 |



|   |           |           |           |
|---|-----------|-----------|-----------|
| 6 | -1.347517 | -1.520525 | -2.120967 |
| 8 | -2.468925 | -1.000974 | -1.820024 |
| 8 | -0.708109 | -1.432217 | -3.171612 |

|   |           |           |           |
|---|-----------|-----------|-----------|
| 6 | 0.452134  | -1.795806 | -1.262874 |
| 8 | -0.702087 | -1.348156 | -1.465556 |
| 8 | 1.380876  | -1.924352 | -2.105228 |

**TS5**

| Atomic Number | Coordinates (Angstroms) |           |           |
|---------------|-------------------------|-----------|-----------|
|               | X                       | Y         | Z         |
| 6             | -1.737560               | 2.167056  | 1.276336  |
| 6             | -0.991743               | 1.285876  | 0.268187  |
| 6             | -1.985908               | 1.254749  | -0.913294 |
| 6             | -2.496288               | 2.683385  | -0.918875 |
| 1             | -2.292631               | 1.528417  | 1.978191  |
| 1             | -1.026696               | 2.764283  | 1.858009  |
| 1             | -0.813158               | 0.277560  | 0.670404  |
| 1             | -1.463703               | 0.983786  | -1.835036 |
| 1             | -1.729965               | 3.302322  | -1.412429 |
| 1             | -3.436011               | 2.821965  | -1.470772 |
| 7             | -2.669167               | 3.002140  | 0.497820  |
| 6             | -2.685607               | 4.429632  | 0.832126  |
| 1             | -3.511175               | 4.884686  | 0.270143  |
| 1             | -2.938860               | 4.513635  | 1.895775  |
| 6             | -1.403320               | 5.170599  | 0.545329  |
| 6             | -1.167109               | 5.723899  | -0.719345 |
| 6             | -0.393490               | 5.270706  | 1.511266  |
| 6             | 0.050571                | 6.330739  | -1.021200 |
| 1             | -1.951480               | 5.680733  | -1.473563 |
| 6             | 0.826182                | 5.875706  | 1.214694  |
| 1             | -0.570253               | 4.877664  | 2.511221  |
| 6             | 1.053660                | 6.402067  | -0.055988 |
| 1             | 0.216261                | 6.748453  | -2.010827 |
| 1             | 1.598412                | 5.939005  | 1.977170  |
| 1             | 2.007671                | 6.866714  | -0.291983 |
| 7             | 0.226928                | 1.935442  | -0.168588 |
| 6             | 1.320748                | 1.364070  | 0.155923  |
| 1             | 1.328390                | 0.417289  | 0.727676  |
| 6             | 2.649724                | 1.897121  | -0.174954 |
| 6             | 3.774026                | 1.242070  | 0.341811  |
| 7             | 2.741853                | 2.990959  | -0.957131 |
| 6             | 5.042194                | 1.730802  | 0.046339  |
| 1             | 3.655432                | 0.359029  | 0.967815  |
| 6             | 3.963819                | 3.447387  | -1.225005 |
| 6             | 5.143095                | 2.863162  | -0.753040 |
| 1             | 5.926165                | 1.230330  | 0.431252  |
| 1             | 4.010254                | 4.333647  | -1.857781 |
| 1             | 6.107633                | 3.286857  | -1.015097 |
| 7             | -2.950474               | 0.193786  | -0.660623 |
| 6             | -4.185740               | 0.431199  | -0.440315 |
| 1             | -4.606684               | 1.441948  | -0.419806 |
| 6             | -5.093694               | -0.692675 | -0.193283 |
| 6             | -6.453408               | -0.504163 | 0.043743  |
| 7             | -4.532712               | -1.917393 | -0.213499 |
| 6             | -7.253748               | -1.621855 | 0.266760  |
| 1             | -6.867496               | 0.499826  | 0.052848  |
| 6             | -5.299749               | -2.984678 | 0.000237  |
| 6             | -6.670219               | -2.883377 | 0.243356  |
| 1             | -8.316563               | -1.507093 | 0.455646  |
| 1             | -4.783958               | -3.942818 | -0.028354 |
| 1             | -7.257772               | -3.779121 | 0.412655  |
| 30            | -2.306477               | -1.907913 | -0.239234 |
| 17            | -2.080482               | -1.678503 | 2.060213  |
| 17            | -2.146264               | -4.169493 | -0.798456 |
| 6             | 1.985625                | -2.876447 | 0.140288  |
| 6             | 2.979211                | -2.231330 | -0.795134 |
| 8             | 0.740538                | -2.146175 | 0.021941  |
| 1             | 1.796263                | -3.898702 | -0.212981 |
| 1             | 3.113600                | -1.157093 | -0.779521 |
| 1             | 3.442103                | -2.783240 | -1.594811 |
| 6             | 2.279478                | -2.881670 | 1.623353  |
| 1             | 1.369215                | -3.176540 | 2.151316  |
| 1             | 3.080545                | -3.580367 | 1.862299  |
| 1             | 2.578394                | -1.886463 | 1.965761  |
| 53            | 5.454682                | -2.397506 | 0.351475  |

**INT7**

| Atomic Number | Coordinates (Angstroms) |           |           |
|---------------|-------------------------|-----------|-----------|
|               | X                       | Y         | Z         |
| 6             | -3.088796               | 2.003706  | 1.186170  |
| 6             | -1.963216               | 1.020811  | 0.821192  |
| 6             | -2.447272               | 0.391885  | -0.529295 |
| 6             | -3.688411               | 1.200170  | -0.877413 |
| 1             | -3.305703               | 2.023485  | 2.259802  |
| 1             | -2.774613               | 3.019707  | 0.880765  |
| 1             | -1.883917               | 0.218101  | 1.572186  |
| 1             | -1.661357               | 0.486123  | -1.278753 |
| 1             | -3.380397               | 2.098164  | -1.444233 |
| 1             | -4.416274               | 0.656612  | -1.492584 |
| 7             | -4.241024               | 1.526626  | 0.432405  |
| 6             | -5.416312               | 2.400226  | 0.435801  |
| 1             | -6.218596               | 1.856752  | -0.079510 |
| 1             | -5.724816               | 2.519577  | 1.481232  |
| 6             | -5.224761               | 3.752193  | -0.204502 |
| 6             | -5.397971               | 3.914100  | -1.584239 |
| 6             | -4.823241               | 4.858367  | 0.552480  |
| 6             | -5.174286               | 5.146667  | -2.193960 |
| 1             | -5.717906               | 3.062687  | -2.183490 |
| 6             | -4.601101               | 6.094939  | -0.051573 |
| 1             | -4.691794               | 4.747499  | 1.627896  |
| 6             | -4.775005               | 6.241050  | -1.427378 |
| 1             | -5.314710               | 5.254593  | -3.266118 |
| 1             | -4.294357               | 6.945033  | 0.551643  |
| 1             | -4.603385               | 7.204325  | -1.899568 |
| 7             | -0.710437               | 1.727485  | 0.667099  |
| 6             | 0.218887                | 1.401991  | 1.481306  |
| 1             | 0.071047                | 0.597225  | 2.221691  |
| 6             | 1.555779                | 2.011756  | 1.504245  |
| 6             | 2.503473                | 1.463045  | 2.377550  |
| 7             | 1.832620                | 3.053490  | 0.694709  |
| 6             | 3.793282                | 1.984722  | 2.399972  |
| 1             | 2.224911                | 0.626893  | 3.015276  |
| 6             | 3.070211                | 3.546483  | 0.737125  |
| 6             | 4.087523                | 3.051230  | 1.559448  |
| 1             | 4.553137                | 1.560078  | 3.049929  |
| 1             | 3.270541                | 4.385984  | 0.072560  |
| 1             | 5.080509                | 3.487818  | 1.525983  |
| 7             | -2.661936               | -1.044656 | -0.326905 |
| 6             | -3.826412               | -1.489354 | -0.029082 |
| 1             | -4.695958               | -0.831662 | 0.058578  |
| 6             | -4.025917               | -2.912908 | 0.238204  |
| 6             | -5.290064               | -3.443394 | 0.490150  |
| 7             | -2.917950               | -3.674965 | 0.221829  |
| 6             | -5.402024               | -4.810450 | 0.728145  |
| 1             | -6.160419               | -2.794467 | 0.493719  |
| 6             | -3.027275               | -4.982866 | 0.445166  |
| 6             | -4.253584               | -5.595002 | 0.706235  |
| 1             | -6.371845               | -5.263199 | 0.925084  |
| 1             | -2.100923               | -5.551359 | 0.406214  |
| 1             | -4.297750               | -6.663526 | 0.885817  |
| 30            | -1.078258               | -2.545889 | -0.265111 |
| 17            | -0.130291               | -2.293346 | 1.808076  |
| 17            | -0.390901               | -4.122359 | -1.773120 |
| 6             | 3.529430                | -1.294188 | -0.604804 |
| 6             | 3.385483                | 0.178994  | -0.997955 |
| 8             | 2.189755                | -1.821120 | -0.877419 |
| 1             | 4.205812                | -1.827872 | -1.275658 |
| 1             | 3.745636                | 0.867072  | -0.229086 |
| 1             | 3.852436                | 0.425432  | -1.953331 |
| 6             | 3.871381                | -1.544463 | 0.838064  |
| 1             | 3.869561                | -2.613455 | 1.060421  |
| 1             | 4.868883                | -1.139150 | 1.035630  |
| 1             | 3.151869                | -1.050187 | 1.497719  |
| 53            | 7.111332                | 0.499777  | -0.561207 |
| 6             | 1.348258                | -0.815960 | -1.079475 |

|   |          |           |           |
|---|----------|-----------|-----------|
| 8 | 0.140235 | -0.935323 | -1.212109 |
| 8 | 1.956325 | 0.366671  | -1.131748 |

## Reaction with co-cat on carbon less substituted

### INT

| Atomic Number | Coordinates (Angstroms) |           |           |
|---------------|-------------------------|-----------|-----------|
|               | X                       | Y         | Z         |
| 6             | 2.545629                | 0.140785  | -0.415689 |
| 6             | 2.724035                | -1.070292 | 0.371968  |
| 8             | 3.853653                | -0.420884 | -0.217123 |
| 1             | 2.178278                | 0.016659  | -1.436114 |
| 1             | 2.474764                | -2.043118 | -0.050362 |
| 1             | 2.672767                | -1.006251 | 1.459331  |
| 6             | 2.274730                | 1.467315  | 0.217437  |
| 1             | 2.734602                | 2.280724  | -0.351888 |
| 1             | 1.194236                | 1.642365  | 0.251710  |
| 1             | 2.663125                | 1.496955  | 1.239451  |
| 53            | -1.698365               | -0.042398 | -0.007876 |

### TS1

| Atomic Number | Coordinates (Angstroms) |           |           |
|---------------|-------------------------|-----------|-----------|
|               | X                       | Y         | Z         |
| 6             | 2.113061                | -0.032924 | -0.370837 |
| 6             | 1.036071                | -0.841372 | 0.305190  |
| 8             | 3.134873                | -0.853917 | -0.028890 |
| 1             | 1.914628                | 0.006908  | -1.448999 |
| 1             | 0.846035                | -1.801660 | -0.128262 |
| 1             | 1.035386                | -0.817860 | 1.377637  |
| 6             | 2.254104                | 1.395203  | 0.147144  |
| 1             | 3.149849                | 1.833931  | -0.283419 |
| 1             | 1.406190                | 2.020438  | -0.116196 |
| 1             | 2.367764                | 1.396842  | 1.228719  |
| 53            | -1.287137               | 0.020138  | -0.016742 |

### INT1

| Atomic Number | Coordinates (Angstroms) |           |           |
|---------------|-------------------------|-----------|-----------|
|               | X                       | Y         | Z         |
| 6             | -2.103701               | -0.235656 | 0.217277  |
| 6             | -0.794819               | -0.495003 | 0.999181  |
| 1             | -2.796150               | -0.442776 | 1.091330  |
| 1             | -0.648001               | -1.550011 | 1.154406  |
| 1             | -0.687924               | 0.070038  | 1.914009  |
| 6             | -2.284752               | 1.266459  | -0.079051 |
| 1             | -3.299050               | 1.423644  | -0.434945 |
| 1             | -2.119637               | 1.902480  | 0.794836  |
| 1             | -1.603734               | 1.570382  | -0.868122 |
| 53            | 1.144792                | 0.037385  | -0.075110 |
| 8             | -2.302482               | -1.021248 | -0.811892 |

### INT2

| Atomic Number | Coordinates (Angstroms) |           |           |
|---------------|-------------------------|-----------|-----------|
|               | X                       | Y         | Z         |
| 6             | 0.737879                | 1.060459  | -0.396891 |
| 6             | 0.026381                | -0.298557 | -0.392878 |
| 8             | 1.989192                | 0.764012  | -0.808289 |
| 1             | 0.191616                | 1.711316  | -1.098387 |
| 1             | 0.043982                | -0.768831 | -1.358774 |
| 1             | 0.363343                | -0.960500 | 0.386249  |
| 6             | 0.698959                | 1.739669  | 0.977564  |
| 1             | 1.298036                | 2.644769  | 0.934599  |
| 1             | -0.305202               | 2.011255  | 1.292278  |
| 1             | 1.133995                | 1.088587  | 1.733324  |
| 53            | -2.241736               | -0.229832 | -0.004475 |

|   |          |           |           |
|---|----------|-----------|-----------|
| 6 | 4.118738 | -0.643572 | 0.154032  |
| 8 | 3.532241 | -1.219379 | 0.952450  |
| 8 | 4.802881 | -0.131321 | -0.607044 |

### TS2

| Atomic Number | Coordinates (Angstroms) |           |           |
|---------------|-------------------------|-----------|-----------|
|               | X                       | Y         | Z         |
| 6             | -0.918471               | 1.184648  | 0.145385  |
| 6             | 0.143280                | 0.547780  | 1.051843  |
| 1             | -1.588004               | 1.590458  | 0.935587  |
| 1             | -0.252123               | -0.293831 | 1.594484  |
| 1             | 0.639562                | 1.241043  | 1.713268  |
| 6             | -0.370933               | 2.405550  | -0.605103 |
| 1             | -1.194626               | 2.916858  | -1.094458 |
| 1             | 0.125129                | 3.114748  | 0.056995  |
| 1             | 0.333051                | 2.097993  | -1.372360 |
| 53            | 1.869177                | -0.402028 | -0.036407 |
| 8             | -1.555483               | 0.312442  | -0.650294 |
| 6             | -3.439813               | -0.705362 | 0.045478  |
| 8             | -3.560349               | -0.193112 | 1.072286  |
| 8             | -3.585884               | -1.363764 | -0.888188 |

### INT3

| Atomic Number | Coordinates (Angstroms) |           |           |
|---------------|-------------------------|-----------|-----------|
|               | X                       | Y         | Z         |
| 6             | -0.918471               | 1.184648  | 0.145385  |
| 6             | 0.143280                | 0.547780  | 1.051843  |
| 1             | -1.588004               | 1.590458  | 0.935587  |
| 1             | -0.252123               | -0.293831 | 1.594484  |
| 1             | 0.639562                | 1.241043  | 1.713268  |
| 6             | -0.370933               | 2.405550  | -0.605103 |
| 1             | -1.194626               | 2.916858  | -1.094458 |
| 1             | 0.125129                | 3.114748  | 0.056995  |
| 1             | 0.333051                | 2.097993  | -1.372360 |
| 53            | 1.869177                | -0.402028 | -0.036407 |
| 8             | -1.555483               | 0.312442  | -0.650294 |
| 6             | -3.439813               | -0.705362 | 0.045478  |
| 8             | -3.560349               | -0.193112 | 1.072286  |
| 8             | -3.585884               | -1.363764 | -0.888188 |

### TS3

| Atomic Number | Coordinates (Angstroms) |           |           |
|---------------|-------------------------|-----------|-----------|
|               | X                       | Y         | Z         |
| 6             | 1.074035                | 0.730839  | -0.343360 |
| 6             | 0.437555                | -0.442301 | 0.387961  |
| 1             | 0.483792                | 0.959064  | -1.215173 |
| 1             | 0.259954                | -0.406228 | 1.437775  |
| 1             | 0.432566                | -1.401507 | -0.079852 |
| 6             | 1.206577                | 1.966853  | 0.532786  |
| 1             | 1.672781                | 2.761991  | -0.037052 |
| 1             | 0.229245                | 2.304384  | 0.858947  |
| 1             | 1.814720                | 1.760120  | 1.405662  |
| 53            | -2.122024               | -0.138039 | -0.057778 |
| 6             | 3.100788                | -0.450597 | -0.044427 |
| 8             | 4.248229                | -0.627548 | -0.412557 |
| 8             | 2.508565                | -0.888745 | 0.958177  |
| 8             | 2.325765                | 0.329981  | -0.858846 |

### INT4

| Atomic Number | Coordinates (Angstroms) |           |           |    |           |           |           |
|---------------|-------------------------|-----------|-----------|----|-----------|-----------|-----------|
|               | X                       | Y         | Z         |    |           |           |           |
|               |                         |           |           | 8  | 4.866123  | -0.879138 | -0.254896 |
|               |                         |           |           | 53 | -2.794993 | -0.133497 | -0.049617 |
|               |                         |           |           | 6  | 1.520917  | 2.109792  | 0.363085  |
| 6             | 1.590516                | -0.456973 | 0.543124  | 1  | 1.831908  | 2.937257  | -0.263482 |
| 1             | 0.742218                | -1.014216 | 0.184025  | 1  | 0.444630  | 2.158861  | 0.485725  |
| 1             | 1.478526                | -0.247511 | 1.598055  | 1  | 1.989953  | 2.208963  | 1.335849  |
| 8             | 2.768366                | -1.244061 | 0.364162  | 6  | 1.894557  | 0.795004  | -0.279446 |
| 8             | 3.322122                | 0.704526  | -0.421526 | 1  | 1.474868  | 0.717584  | -1.273240 |
| 6             | 3.747286                | -0.503862 | -0.116625 |    |           |           |           |

## Reaction with co-cat on carbon more substituted

### INT

| Atomic Number | Coordinates (Angstroms) |           |           |
|---------------|-------------------------|-----------|-----------|
|               | X                       | Y         | Z         |
| 6             | 2.545629                | 0.140785  | -0.415689 |
| 6             | 2.724035                | -1.070292 | 0.371968  |
| 8             | 3.853653                | -0.420884 | -0.217123 |
| 1             | 2.178278                | 0.016659  | -1.436114 |
| 1             | 2.474764                | -2.043118 | -0.050362 |
| 1             | 2.672767                | -1.006251 | 1.459331  |
| 6             | 2.274730                | 1.467315  | 0.217437  |
| 1             | 2.734602                | 2.280724  | -0.351888 |
| 1             | 1.194236                | 1.642365  | 0.251710  |
| 1             | 2.663125                | 1.496955  | 1.239451  |
| 53            | -1.698365               | -0.042398 | -0.007876 |

### TS1

| Atomic Number | Coordinates (Angstroms) |           |           |
|---------------|-------------------------|-----------|-----------|
|               | X                       | Y         | Z         |
| 6             | 1.263651                | 0.257750  | -0.361299 |
| 6             | 1.978193                | -0.879489 | 0.301908  |
| 8             | 3.229316                | -0.656287 | -0.167078 |
| 1             | 1.242300                | 0.164507  | -1.447428 |
| 1             | 1.512909                | -1.851113 | 0.012231  |
| 1             | 1.852348                | -0.800620 | 1.411288  |
| 6             | 1.518899                | 1.642268  | 0.149168  |
| 1             | 0.912193                | 2.390069  | -0.365283 |
| 1             | 1.319473                | 1.707898  | 1.224036  |
| 1             | 2.572689                | 1.887390  | -0.012697 |
| 53            | -1.203979               | -0.082472 | -0.000456 |

### INT1

| Atomic Number | Coordinates (Angstroms) |           |           |
|---------------|-------------------------|-----------|-----------|
|               | X                       | Y         | Z         |
| 6             | 1.163661                | 0.274573  | -0.367455 |
| 1             | 1.182228                | 0.202384  | -1.457989 |
| 53            | -1.171555               | -0.089035 | 0.001756  |
| 6             | 1.456033                | 1.656637  | 0.144124  |
| 1             | 2.518148                | 1.863553  | -0.018066 |
| 1             | 0.872553                | 2.425981  | -0.366428 |
| 1             | 1.260681                | 1.725191  | 1.220039  |
| 6             | 1.939886                | -0.857060 | 0.275687  |
| 1             | 1.469843                | -1.827656 | -0.025496 |
| 1             | 1.780469                | -0.791534 | 1.386432  |
| 8             | 3.206375                | -0.665494 | -0.143212 |

### INT2

| Atomic Number | Coordinates (Angstroms) |          |           |
|---------------|-------------------------|----------|-----------|
|               | X                       | Y        | Z         |
| 6             | 0.104634                | 0.144929 | -0.070587 |
| 1             | 0.294406                | 0.294427 | -1.136962 |

|    |           |           |           |
|----|-----------|-----------|-----------|
| 53 | -2.273620 | -0.016024 | -0.115131 |
| 6  | 0.434732  | 1.351296  | 0.761262  |
| 1  | 1.522902  | 1.463194  | 0.772920  |
| 1  | -0.002279 | 2.269762  | 0.362330  |
| 1  | 0.094378  | 1.221025  | 1.794507  |
| 6  | 0.672999  | -1.175052 | 0.412846  |
| 1  | 0.188741  | -2.004500 | -0.162055 |
| 1  | 0.334462  | -1.321758 | 1.473838  |
| 6  | 4.269647  | 0.226071  | -0.244422 |
| 8  | 4.855178  | -0.779278 | -0.127755 |
| 8  | 3.787205  | 1.283756  | -0.382596 |
| 8  | 2.004763  | -1.049023 | 0.240698  |

### TS2

| Atomic Number | Coordinates (Angstroms) |           |           |
|---------------|-------------------------|-----------|-----------|
|               | X                       | Y         | Z         |
| 6             | 0.416650                | 0.140366  | -0.655586 |
| 1             | 0.132761                | -0.025592 | -1.690221 |
| 53            | -2.256296               | -0.034370 | 0.071596  |
| 6             | 0.743384                | 1.533597  | -0.246539 |
| 1             | 0.815841                | 1.624540  | 0.840087  |
| 1             | 1.704851                | 1.830904  | -0.679593 |
| 1             | -0.003945               | 2.237013  | -0.616272 |
| 6             | 1.020983                | -1.015188 | 0.021465  |
| 1             | 0.512734                | -1.974333 | -0.157267 |
| 1             | 1.158350                | -0.864512 | 1.104694  |
| 6             | 3.705761                | 0.000684  | 0.295059  |
| 8             | 3.313541                | 0.069202  | 1.417144  |
| 8             | 4.499639                | 0.143950  | -0.579252 |
| 8             | 2.179625                | -0.833550 | -0.723192 |

### INT3

| Atomic Number | Coordinates (Angstroms) |           |           |
|---------------|-------------------------|-----------|-----------|
|               | X                       | Y         | Z         |
| 6             | 0.933207                | -0.823494 | -0.024682 |
| 6             | 0.067987                | 0.260425  | -0.640528 |
| 8             | 2.224904                | -0.744246 | -0.597066 |
| 1             | 0.989210                | -0.699895 | 1.062487  |
| 1             | -0.036150               | 0.108140  | -1.717579 |
| 53            | -2.038717               | -0.096038 | 0.076599  |
| 6             | 3.271026                | -0.121246 | 0.186775  |
| 8             | 2.964827                | 0.268001  | 1.327772  |
| 8             | 4.341464                | -0.085910 | -0.444252 |
| 1             | 0.524830                | -1.813731 | -0.257731 |
| 6             | 0.478957                | 1.669760  | -0.311231 |
| 1             | 0.488409                | 1.846407  | 0.767379  |
| 1             | 1.499139                | 1.826841  | -0.679017 |
| 1             | -0.170077               | 2.406808  | -0.788911 |

### TS3

| Atomic Number | Coordinates (Angstroms) |   |   |
|---------------|-------------------------|---|---|
|               | X                       | Y | Z |
|               |                         |   |   |

|    |           |           |           |
|----|-----------|-----------|-----------|
| 6  | 1.179684  | -0.144140 | 1.065953  |
| 6  | 0.578289  | 0.678956  | -0.032910 |
| 8  | 2.195744  | -1.001972 | 0.580158  |
| 1  | 1.585626  | 0.542662  | 1.823629  |
| 1  | 0.617200  | 0.280899  | -1.036803 |
| 53 | -2.023102 | -0.250096 | -0.105425 |
| 6  | 3.128966  | -0.299158 | -0.212288 |
| 8  | 2.781495  | 0.889577  | -0.479903 |
| 8  | 4.134866  | -0.933747 | -0.535683 |
| 1  | 0.445454  | -0.785113 | 1.555413  |
| 6  | 0.279128  | 2.116368  | 0.179771  |
| 1  | -0.194638 | 2.289127  | 1.149404  |
| 1  | 1.233326  | 2.655082  | 0.179625  |
| 1  | -0.355826 | 2.529417  | -0.603455 |

#### INT4

| Atomic<br>Number | Coordinates (Angstroms) |           |           |
|------------------|-------------------------|-----------|-----------|
|                  | X                       | Y         | Z         |
| 6                | 1.343744                | -0.447831 | 0.704844  |
| 1                | 0.465609                | -1.050796 | 0.472786  |
| 1                | 1.333466                | -0.173843 | 1.765403  |
| 8                | 2.534663                | -1.222279 | 0.451052  |
| 8                | 2.934070                | 0.760626  | -0.468549 |
| 6                | 3.448832                | -0.439837 | -0.154661 |
| 8                | 4.585173                | -0.778513 | -0.382405 |
| 53               | -2.460199               | -0.157822 | -0.073305 |
| 6                | 1.084201                | 2.076494  | 0.388775  |
| 1                | 1.310372                | 2.901858  | -0.289222 |
| 1                | 0.004172                | 2.063221  | 0.563202  |
| 1                | 1.591734                | 2.251716  | 1.341749  |
| 6                | 1.497891                | 0.761490  | -0.205460 |
| 1                | 1.005927                | 0.591812  | -1.170501 |
